# Supplementary material for: Maternal immune activation induces sex-dependent behavioral differences in a rat model of schizophrenia
Source: PubMed Central journal article supplement (PMC11040086; doi:10.3389/fpsyt.2024.1375999), 2024-04-10
Supplement: DataSheet_1.pdf [file DataSheet_1.pdf]

## Supplemental materials: the outcome difference between the whole MIA model group vs Control group

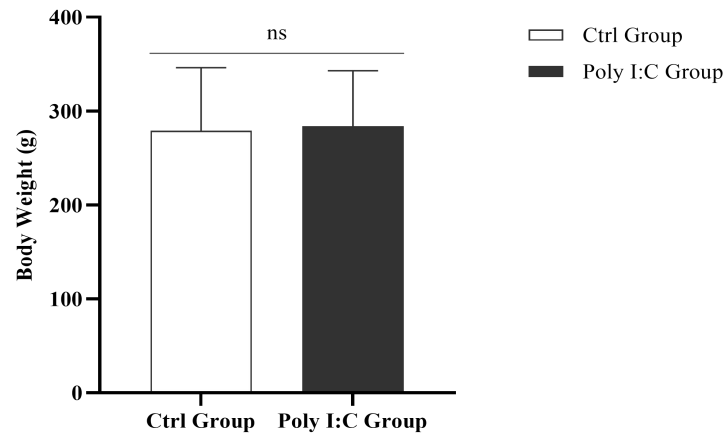

**Figure S1. The impact of Poly I:C treatment on the body weight of the offspring of dams** ( $d = 0.08$ ,  $t = -0.396$ ,  $p > 0.05$ ). ( $n = 39$  in the Ctrl Group,  $n = 77$  in the Poly I:C Group. Ctrl Group, refers to the offspring born to the control dams; Poly I:C Group, refers to the offspring born to the Poly I:C treated dams. Ctrl vs Poly I:C: ns, not significant statistically)

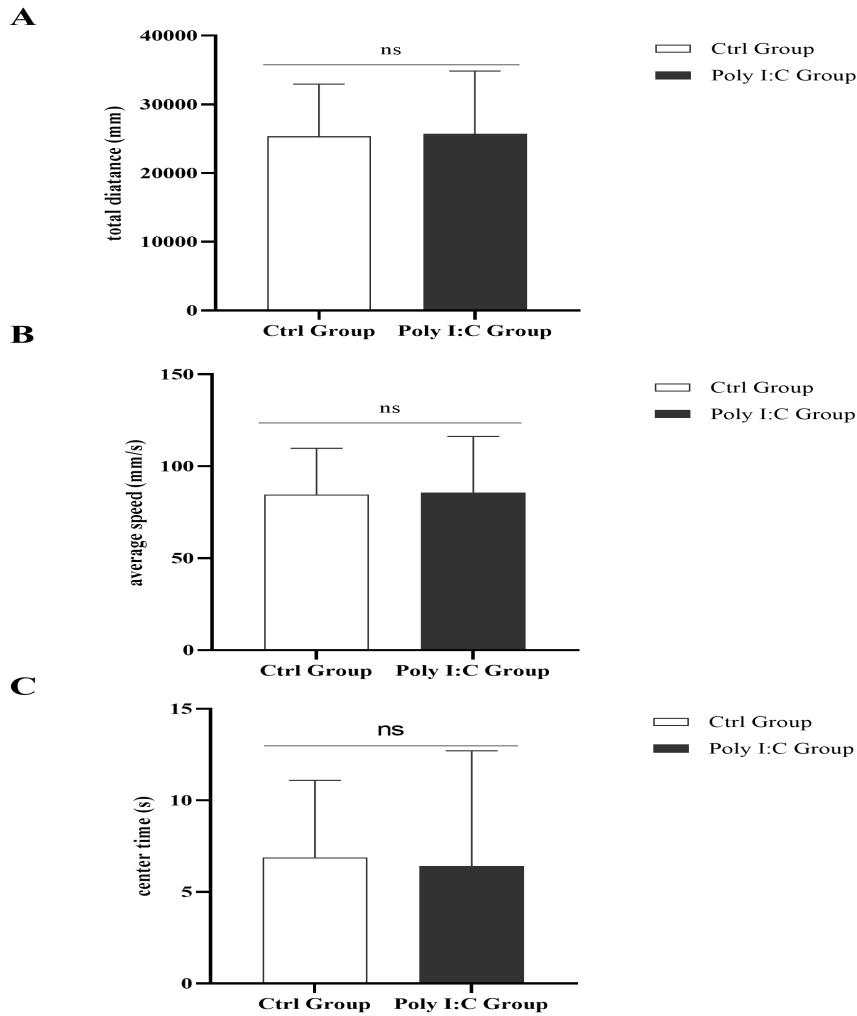

**Figure S2. The impact of Poly I: C treatment on the spontaneous activity of the offspring of dams.** (A) The total movement distance of the offspring ( $d = 0.04$ ,  $t = -0.153$ ,  $p > 0.05$ ). (B) The movement velocity of the offspring ( $d = 0.04$ ,  $t = -0.156$ ,  $p > 0.05$ ). (C) The duration in the central area of the offspring ( $d = 0.09$ ,  $t = 0.313$ ,  $p > 0.05$ ). ( $n = 28$  in the Ctrl Group,  $n = 25$  in the Poly I: C Group. Ctrl Group, refers to the offspring born to the control dams; Poly I: C Group, refers to the offspring born to the Poly I: C treated dams. Poly I: C vs saline: ns, not significant statistically)

**A**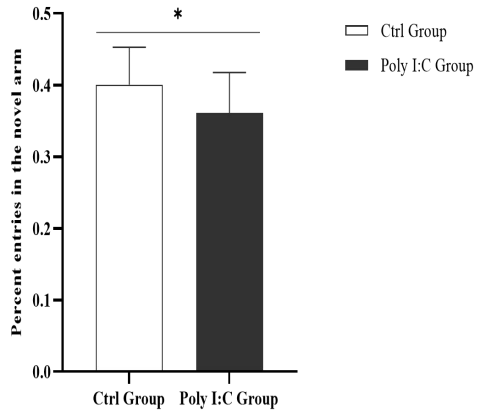**B**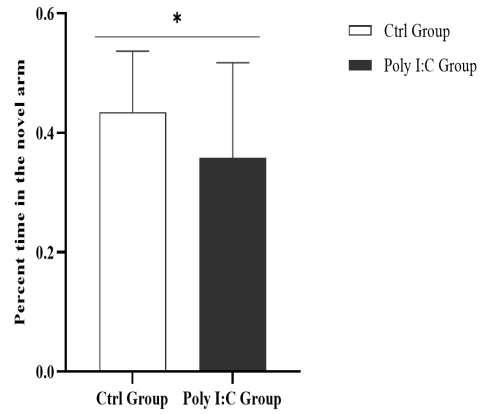

**Figure S3. The impact of Poly I: C treatment on the spatial working memory activity of the offspring of dams.** (A) The percentage novel arm frequencies of the offspring ( $d = 0.73$ ,  $t = 2.644$ ,  $p < 0.05$ ). (B) The percentage novel arm duration of female offspring ( $d = 0.57$ ,  $t = 2.112$ ,  $p < 0.05$ ). ( $n = 28$  in the Ctrl Group,  $n = 25$  in the Poly I:C Group. Ctrl Group, refers to the offspring born to the control dams; Poly I: C Group, refers to the offspring born to the Poly I: C treated dams. Poly I: C vs saline:  $*p < 0.05$ )

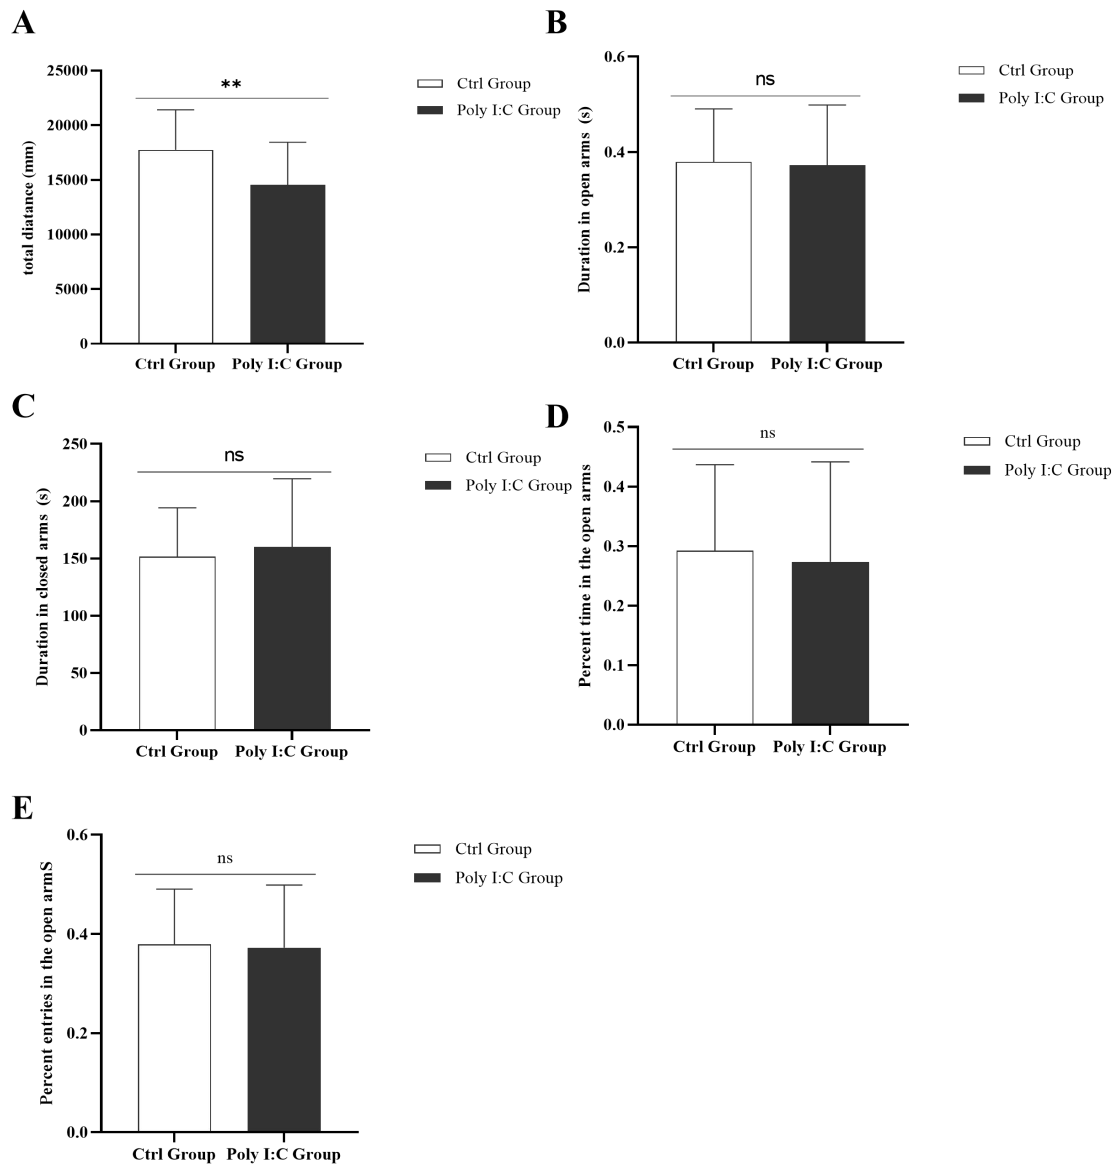

**Figure S4. The impact of Poly I: C treatment on the anxiety-like behavior of the offspring of dams.** (A) The total movement distance of the offspring in the elevated plus maze test ( $d = 3.07$ ,  $t = -0.156$ ,  $p < 0.01$ ). (B) The duration spent in the open arms of the offspring ( $d = 0.15$ ,  $t = 0.553$ ,  $p > 0.05$ ). (C) The duration spent in the closed arms of the offspring ( $d = 0.16$ ,  $t = -0.598$ ,  $p > 0.05$ ). (D) The percentage of open arms duration of the offspring ( $d = 0.12$ ,  $t = 0.445$ ,  $p > 0.05$ ). (E) The percentage open arms frequencies of the offspring ( $d = 0.05$ ,  $t = 0.201$ ,  $p > 0.05$ ). (n = 28 in the Ctrl Group, n = 25 in the Poly I:C Group. Ctrl Group, refers to the offspring born to the control dams; Poly I:C Group, refers to the offspring born to the Poly I:C treated dams. Poly I: C vs saline:  $**p < 0.01$ ; ns, not significant statistically)

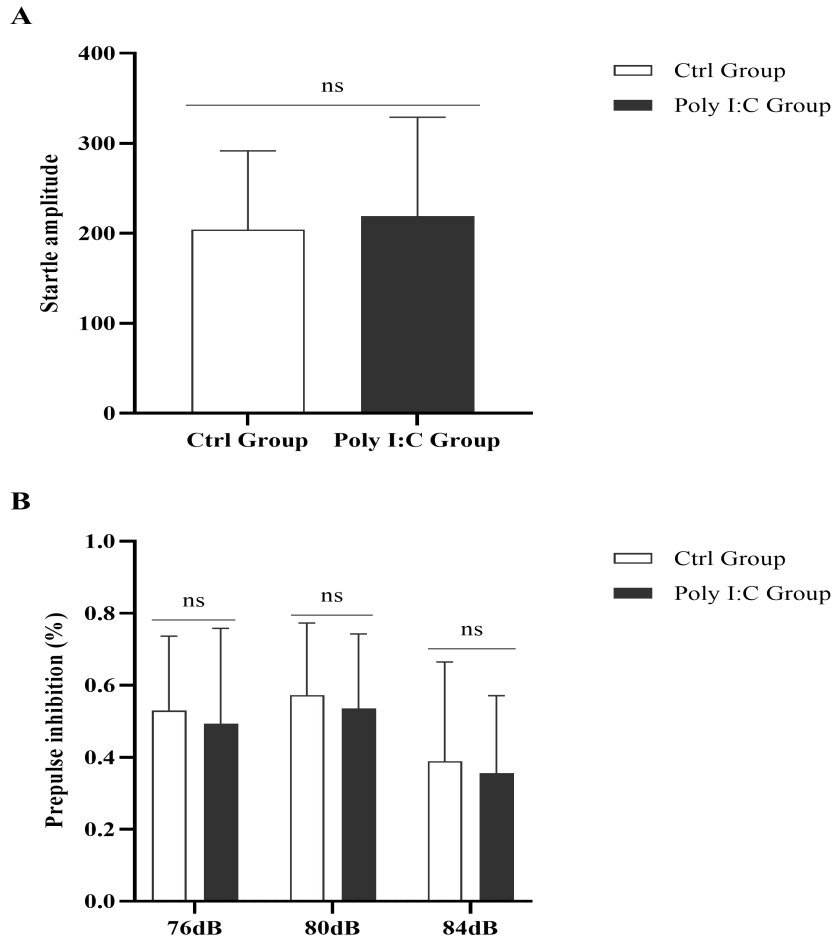

**Figure S5. The impact of Poly I: C treatment on the sensory gating function of female and male offspring of dams.** (A) The average startle amplitude of the offspring when stimulus intensity was 120 dB ( $d = 0.15$ ,  $t = -0.546$ ,  $p > 0.05$ ). (B) PPI index of the offspring in different pre-pulse intensities (76 dB+120 dB,  $d = 0.15$ ,  $t = 0.563$ ,  $p > 0.05$ ; 80 dB+120 dB,  $d = 0.18$ ,  $t = 0.671$ ,  $p > 0.05$ ; 84 dB+120 dB,  $d = 0.13$ ,  $t = 0.484$ ,  $p > 0.05$ ). ( $n = 28$  in the Ctrl Group,  $n = 25$  in the Poly I:C Group. Ctrl Group, refers to the offspring born to the control dams; Poly I:C Group, refers to the offspring born to the Poly I:C treated dams. Poly I: C vs saline: ns, not significant statistically)

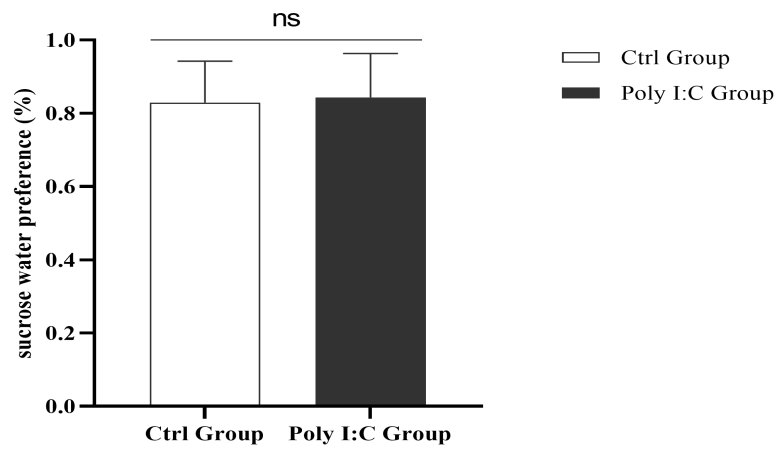

**Figure S6. The impact of Poly I: C treatment on the proportion of sucrose water consumption of the offspring of dams ( $d = 0.12$ ,  $t = -0.430$ ,  $p > 0.05$ ). (n = 28 in the Ctrl Group, n = 25 in the Poly I:C Group. Ctrl Group, refers to the offspring born to the control dams; Poly I:C Group, refers to the offspring born to the Poly I:C treated dams. Poly I: C vs saline: ns, not significant statistically)**
